# Supplementary material for: Longitudinal fecal hormone monitoring of adrenocortical function in zoo housed fishing cats (Prionailurus viverrinus) during institutional transfers and breeding introductions
Source: PubMed Central journal article supplement (PMC7080239; doi:10.1371/journal.pone.0230239), 2020-03-18
Supplement: pone.0230239.s001.pdf [file pone.0230239.s001.pdf]

| Management variables           |                                        | # indoor off exhibit | total indoor enclosure size | indoor enclosure height     | # outdoor on exhibit enclosures | # outdoor off exhibit enclosures | total outdoor enclosure size | outdoor enclosure height | how busy is holding          | # keepers    | average years experience | previous exp. | free contact                 | fast days     | amount of time given access outside | visual access to carnivores | # training    | # enrichment  | # of nestboxes              |
|--------------------------------|----------------------------------------|----------------------|-----------------------------|-----------------------------|---------------------------------|----------------------------------|------------------------------|--------------------------|------------------------------|--------------|--------------------------|---------------|------------------------------|---------------|-------------------------------------|-----------------------------|---------------|---------------|-----------------------------|
| # indoor on exhibit enclosures | Pearson Correlation<br>Sig. (2-tailed) | 0.21<br>0.43         | 0.29<br>0.32                | 0.45<br>0.16                | -0.35<br>0.19                   | 0.48<br>0.06                     | -0.24<br>0.60                | -0.24<br>0.61            | <b>.837**</b><br><b>0.00</b> | 0.19<br>0.47 | 0.26<br>0.32             | -0.28<br>0.41 | <b>.630**</b><br><b>0.01</b> | -0.01<br>0.97 | -0.06<br>0.81                       | 0.00<br>1.00                | -0.06<br>0.83 | -0.14<br>0.60 | <b>.744*</b><br><b>0.01</b> |
| # indoor off exhibit enclosure | Pearson Correlation<br>Sig. (2-tailed) |                      | 0.29<br>0.32                | -0.03<br>0.93               | -0.21<br>0.45                   | 0.29<br>0.28                     | -0.21<br>0.66                | 0.06<br>0.90             | 0.32<br>0.22                 | 0.25<br>0.35 | 0.13<br>0.64             | 0.41<br>0.22  | -0.01<br>0.97                | -0.28<br>0.30 | 0.23<br>0.39                        | -0.14<br>0.60               | 0.23<br>0.39  | 0.41<br>0.11  | 0.02<br>0.95                |
| total indoor enclosure size    | Pearson Correlation<br>Sig. (2-tailed) |                      |                             | <b>.728*</b><br><b>0.01</b> | <b>-.724**</b><br><b>0.00</b>   | -0.05<br>0.88                    | -0.10<br>0.83                | -0.11<br>0.82            | 0.14<br>0.65                 | 0.41<br>0.15 | 0.52<br>0.06             | -0.39<br>0.27 | -0.12<br>0.69                | -0.09<br>0.76 | 0.49<br>0.08                        | -0.15<br>0.61               | 0.06<br>0.84  | 0.39<br>0.17  | -0.20<br>0.62               |
| indoor enclosure height        | Pearson Correlation<br>Sig. (2-tailed) |                      |                             |                             | <b>-.624*</b><br><b>0.04</b>    | 0.15<br>0.67                     | -0.27<br>0.61                | -0.20<br>0.68            | 0.24<br>0.48                 | 0.38<br>0.26 | 0.19<br>0.58             | -0.42<br>0.30 | 0.10<br>0.78                 | -0.06<br>0.85 | 0.21<br>0.53                        | 0.14<br>0.69                | -0.12<br>0.73 | 0.01<br>0.99  | 0.04<br>0.93                |

| Management variables             |                                        | # indoor off exhibit | total indoor enclosure size | indoor enclosure height | # outdoor on exhibit enclosures | # outdoor off exhibit enclosures | total outdoor enclosure size | outdoor enclosure height | how busy is holding | # keepers | average years experience | previous exp.  | free contact | fast days | amount of time given access outside | visual access to carnivores | # training | # enrichment | # of nestboxes |
|----------------------------------|----------------------------------------|----------------------|-----------------------------|-------------------------|---------------------------------|----------------------------------|------------------------------|--------------------------|---------------------|-----------|--------------------------|----------------|--------------|-----------|-------------------------------------|-----------------------------|------------|--------------|----------------|
| # outdoor on exhibit enclosures  | Pearson Correlation<br>Sig. (2-tailed) |                      | 0.24                        | 0.01                    | -0.19                           | -0.22                            | -0.49                        | -0.42                    | 0.35                | -0.08     | 0.10                     | <b>-.797**</b> | 0.12         | 0.39      | -0.14                               | 0.32                        |            |              |                |
|                                  |                                        |                      | 0.37                        | 0.99                    | 0.68                            | 0.41                             | 0.05                         | 0.11                     | 0.30                | 0.77      | 0.72                     | <b>0.00</b>    | 0.66         | 0.13      | 0.60                                | 0.36                        |            |              |                |
| # outdoor off exhibit enclosures | Pearson Correlation<br>Sig. (2-tailed) |                      |                             | 0.04                    | -0.04                           | .497*                            | -0.22                        | 0.28                     | -0.04               | 0.44      | 0.00                     | -0.38          | -0.33        | 0.31      | 0.03                                | <b>.813**</b>               |            |              |                |
|                                  |                                        |                      |                             | 0.93                    | 0.93                            | 0.05                             | 0.41                         | 0.29                     | 0.91                | 0.09      | 1.00                     | 0.15           | 0.21         | 0.25      | 0.92                                | <b>0.00</b>                 |            |              |                |
| total outdoor enclosure size     | Pearson Correlation<br>Sig. (2-tailed) |                      |                             |                         | -0.11                           | -0.32                            | -0.38                        | -0.21                    | -0.28               | -0.11     | -0.27                    | 0.14           | -0.20        | -0.31     | 0.30                                | -0.10                       |            |              |                |
|                                  |                                        |                      |                             |                         | 0.84                            | 0.48                             | 0.40                         | 0.65                     | 0.65                | 0.82      | 0.56                     | 0.77           | 0.67         | 0.49      | 0.52                                | 0.87                        |            |              |                |
| outdoor enclosure height         | Pearson Correlation<br>Sig. (2-tailed) |                      |                             |                         | -0.43                           | -0.56                            | -0.15                        | 0.42                     | -0.13               | 0.31      | <b>.861*</b>             | -0.38          | -0.09        | 0.50      | 0.00                                |                             |            |              |                |
|                                  |                                        |                      |                             |                         | 0.34                            | 0.19                             | 0.75                         | 0.48                     | 0.78                | 0.50      | <b>0.01</b>              | 0.41           | 0.85         | 0.26      | 1.00                                |                             |            |              |                |
| how busy is holding              | Pearson Correlation<br>Sig. (2-tailed) |                      |                             |                         |                                 | 0.46                             | 0.39                         | -0.29                    | <b>.750**</b>       | -0.23     | -0.10                    | -0.30          | 0.15         | -0.21     | <b>.720*</b>                        |                             |            |              |                |
|                                  |                                        |                      |                             |                         |                                 | 0.07                             | 0.14                         | 0.38                     | <b>0.00</b>         | 0.39      | 0.70                     | 0.27           | 0.58         | 0.45      | <b>0.02</b>                         |                             |            |              |                |

| Management variables                |                                        | # indoor off exhibit | total indoor enclosure size | indoor enclosure height | # outdoor on exhibit enclosures | # outdoor off exhibit enclosures | total outdoor enclosure size | outdoor enclosure height | how busy is holding | # keepers | average years experience | previous exp. | free contact | fast days | amount of time given access outside | visual access to carnivores | # training | # enrichment | # of nestboxes |
|-------------------------------------|----------------------------------------|----------------------|-----------------------------|-------------------------|---------------------------------|----------------------------------|------------------------------|--------------------------|---------------------|-----------|--------------------------|---------------|--------------|-----------|-------------------------------------|-----------------------------|------------|--------------|----------------|
| # keepers                           | Pearson Correlation<br>Sig. (2-tailed) |                      |                             |                         |                                 |                                  |                              |                          |                     |           | 0.27                     | -0.04         | 0.24         | -0.16     | 0.43                                | -0.40                       | 0.08       | 0.19         | -0.16          |
| average years experience            | Pearson Correlation<br>Sig. (2-tailed) |                      |                             |                         |                                 |                                  |                              |                          |                     |           | 0.32                     | 0.90          | 0.36         | 0.55      | 0.09                                | 0.12                        | 0.77       | 0.49         | 0.66           |
| free contact                        | Pearson Correlation<br>Sig. (2-tailed) |                      |                             |                         |                                 |                                  |                              |                          |                     |           |                          | -0.56         | 0.29         | -0.02     | 0.24                                | <b>-0.529*</b>              | 0.01       | 0.12         | 0.16           |
| fast days                           | Pearson Correlation<br>Sig. (2-tailed) |                      |                             |                         |                                 |                                  |                              |                          |                     |           |                          | 0.08          | 0.28         | 0.93      | 0.36                                | <b>0.04</b>                 | 0.98       | 0.67         | 0.67           |
| amount of time given access outside | Pearson Correlation<br>Sig. (2-tailed) |                      |                             |                         |                                 |                                  |                              |                          |                     |           |                          |               |              | 0.13      | -0.10                               | -0.22                       | -0.12      | -0.44        | <b>.633*</b>   |
| visual access to carnivores         | Pearson Correlation<br>Sig. (2-tailed) |                      |                             |                         |                                 |                                  |                              |                          |                     |           |                          |               |              | 0.62      | 0.71                                | 0.42                        | 0.65       | 0.09         | <b>0.05</b>    |
|                                     |                                        |                      |                             |                         |                                 |                                  |                              |                          |                     |           |                          |               |              |           | -0.08                               | 0.20                        | -0.31      | 0.06         | -0.16          |
|                                     |                                        |                      |                             |                         |                                 |                                  |                              |                          |                     |           |                          |               |              |           | 0.78                                | 0.45                        | 0.24       | 0.82         | 0.67           |
|                                     |                                        |                      |                             |                         |                                 |                                  |                              |                          |                     |           |                          |               |              |           |                                     | -0.33                       | -0.27      | 0.41         | -0.56          |
|                                     |                                        |                      |                             |                         |                                 |                                  |                              |                          |                     |           |                          |               |              |           |                                     | 0.21                        | 0.32       | 0.12         | 0.09           |
|                                     |                                        |                      |                             |                         |                                 |                                  |                              |                          |                     |           |                          |               |              |           |                                     |                             | -0.36      | -0.47        | -0.29          |
|                                     |                                        |                      |                             |                         |                                 |                                  |                              |                          |                     |           |                          |               |              |           |                                     |                             | 0.17       | 0.07         | 0.41           |
